# Citation Classics in Systematic Reviews and Meta-Analyses: Who Wrote the Top 100 Most Cited Articles?

Olalekan A. Uthman<sup>1,2,3\*</sup>, Charles I. Okwundu<sup>3,4</sup>, Charles S. Wiysonge<sup>3</sup>, Taryn Young<sup>3,4</sup>, Aileen Clarke<sup>5</sup>

**1** Warwick Centre for Applied Health Research and Delivery (WCAHRD), Division of Health Sciences, Warwick Medical School, the University of Warwick, Coventry, United Kingdom, **2** International Health Group, Liverpool School of Tropical Medicine, Liverpool, United Kingdom, **3** Centre for Evidence-Based Health Care, Faculty of Medicine and Health Sciences, Stellenbosch University, Tygerberg, South Africa, **4** South African Cochrane Centre, South African Medical Research Council, Tygerberg, South Africa, **5** Division of Health Sciences, Warwick Medical School, the University of Warwick, Coventry, United Kingdom

## Abstract

**Background:** Systematic reviews of the literature occupy the highest position in currently proposed hierarchies of evidence. The aims of this study were to assess whether citation classics exist in published systematic review and meta-analysis (SRM), examine the characteristics of the most frequently cited SRM articles, and evaluate the contribution of different world regions.

**Methods:** The 100 most cited SRM were identified in October 2012 using the Science Citation Index database of the Institute for Scientific Information. Data were extracted by one author. Spearman's correlation was used to assess the association between years since publication, numbers of authors, article length, journal impact factor, and average citations per year.

**Results:** Among the 100 citation classics, published between 1977 and 2008, the most cited article received 7308 citations and the least-cited 675 citations. The average citations per year ranged from 27.8 to 401.6. First authors from the USA produced the highest number of citation classics (n=46), followed by the UK (n=28) and Canada (n=15). The 100 articles were published in 42 journals led by the Journal of the American Medical Association (n=18), followed by the British Medical Journal (n=14) and The Lancet (n=13). There was a statistically significant positive correlation between number of authors (Spearman's  $\rho=0.320$ ,  $p=0.001$ ), journal impact factor ( $\rho=0.240$ ,  $p=0.016$ ) and average citations per year. There was a statistically significant negative correlation between average citations per year and year since publication ( $\rho = -0.636$ ,  $p=0.0001$ ). The most cited papers identified seminal contributions and originators of landmark methodological aspects of SRM and reflect major advances in the management of and predisposing factors for chronic diseases.

**Conclusions:** Since the late 1970s, the USA, UK, and Canada have taken leadership in the production of citation classic papers. No first author from low or middle-income countries (LMIC) led one of the most cited 100 SRM.

**Citation:** Uthman OA, Okwundu CI, Wiysonge CS, Young T, Clarke A (2013) Citation Classics in Systematic Reviews and Meta-Analyses: Who Wrote the Top 100 Most Cited Articles? PLoS ONE 8(10): e78517. doi:10.1371/journal.pone.0078517

**Editor:** K. Brad Wray, State University of New York, Oswego, United States of America

**Received:** July 2, 2013; **Accepted:** September 18, 2013; **Published:** October 14, 2013

**Copyright:** © 2013 Uthman et al. This is an open-access article distributed under the terms of the Creative Commons Attribution License, which permits unrestricted use, distribution, and reproduction in any medium, provided the original author and source are credited.

**Funding:** The authors have no support or funding to report.

**Competing interests:** The authors have declared that no competing interests exist.

\* E-mail: olalekan.uthman@warwick.ac.uk

## Background

Systematic reviews of the literature occupy the highest position in currently proposed hierarchies of evidence [1] and occupy this top position for two fundamental premises. Firstly, a systematic review involves the application of scientific strategies which limit bias by systematic assembly, critical appraisal and synthesis of relevant studies on a particular topic [2,3]. Secondly, reviews that include a meta-analysis provide precise estimates of the association studied[4]. Because of the importance of systematic reviews in summarizing the advances of health care knowledge, their number is growing rapidly [4]. If

systematic reviews in fact represent the best level of evidence, they are likely to have great clinical importance[4]. It follows that they may be cited often in the literature. The acknowledgement that one article gives to another is a reference; the acknowledgement that one article receives from another is a citation [5]. The number of citations an article receives after publication reflects its impact on the scientific community. There have been a few recent attempts to identify and analyze "the most cited articles" in various specialties [5–9]. However, an analysis of the most frequently cited systematic review and meta-analysis (SRM) articles has not yet been reported. Montori and colleagues examined whether

systematic reviews receive more citations than narrative reviews [4]. They found that rigorous systematic reviews were cited significantly more often than narrative reviews. In this paper we sought to identify and examine the characteristics of the most cited SRM related articles, such as ranking, year of publication, publishing journal, topic and contribution of different world regions to most cited SRM articles.

In addition, we assessed whether there was an association between year of publication, number of authors, number of pages, journals' impact factor, and average citations per year.

## Methods

The Science Citation Index of the Institute for Scientific Information (ISI) was searched in October 2012 for systematic review and meta-analysis related articles. We searched for articles using validated keywords for identifying SRM [10]. To accredit an article to countries, the method of "absolute country counting" was adopted, in which each country contributing to an article received one paper credit based on the lead author's correspondence or reprint address [11]. The 100 most-cited articles were selected for further descriptive analyses. Data collected included the year of publication, the topic covered, lead author's correspondence country of origin, and number of citations.

We used a density-equalizing map to visualize the citation classics by the corresponding address of the author. We used Gastner and Newman's algorithm [12] in order to produce a map of the world in which countries were re-sized according to the number of most cited SRM articles. These calculations employ a diffusion equation in the Fourier domain borrowed from elementary physics, which allows variable resolution by tracking moving boundaries [12].

The impact factors and immediacy factors of journals listed in the 2012 Journal Citation Reports Science Edition were adopted as quantitative tools for evaluating journals in which these articles were published. A journal's impact factor is a measure of the frequency with which the "average article" in the journal has been cited in a given period of time. The impact factor for a journal is calculated based on a three-year period, and can be considered to be the average number of times published papers are cited up to two years after publication. Non-parametric (Spearman's) correlation was used to assess the association between years since publication (with reference to the year 2012), numbers of authors, article's length (number of pages), journal's impact factor and average citations per year.

## Results

The 100 articles are listed in Table 1 in descending order, ranked according to the total number of citations since publication. Among the 100 citation classics, the most cited article received 7308 citations, and the least-cited 675 citations. The average citations per year ranged from 27.8 to 401.6. Figure 1 shows the density-equalizing map illustrating the number of contributions for each country in SRM citation classics. Density equalising mapping demonstrates that a

relatively small number of countries were responsible for the majority of the top cited SRM articles (Figure 1). First authors from the USA produced the highest citation classics (n=46), followed by the UK (n=28) and Canada (n=15) (Figure 1). All the 100 most cited articles were published in the English Language.

The year of publication with the relevant number of classics identified is shown in Figure 2. The oldest article was published in 1977 and the most recent article in 2008. Figure 3A shows correlation between average citations per year and year since publication (with reference to 2012). There was a statistically significant negative correlation between average citations per year and year since publication (Spearman's  $\rho = -0.636$ , 95% CI -0.739 to -0.501,  $p=0.0001$ ), such that the average citations per year reduces with the number of years since publication.

The number of authors of the most cited articles ranged from one to 22. Four of the articles were authored by a single author and 18 articles by two authors. There was a statistically significant positive correlation between number of authors and average citations per year ( $\rho=0.320$ , 95% CI 0.132 to 0.486,  $p=0.001$ ), such that the greater the number of authors, the higher the average citation per year (Figure 3B). The median length of article was 10 pages (range: 2 to 75 pages). There was no statistically significant correlation between length and average citations per year ( $\rho = -0.052$ , 95% CI -0.246 to 0.146,  $p=0.608$ ). The most cited articles were published in 42 journals (Table 2), led by Journal of The American Medical Association (n=18) followed by the British Medical Journal (n=14), The Lancet (n=13), and the Annals of Internal Medicine (n=7). Journal impact factors ranged from 1.412 (for Biometrics) to 51.658 (for the New England Journal of Medicine).

There was a statistically significant positive correlation between average citations per year and journal impact factor ( $\rho=0.240$ , 95% CI 0.045 to 0.416,  $p=0.016$ ) (Figure 3C). General and internal medicine were the main topics covered by these highly cited articles (n=59). Considerable attention was also given to Psychology and Psychiatry (n=13).

The top-100 list contained landmark contributions dealing with methodological aspects of conducting systematic reviews and meta-analysis (n=17). At number 1, DerSimonian and Laird's landmark article which introduced a novel simple random effects model for combining studies. Egger et al. (number-2) examined the prevalence of funnel plot asymmetry among published meta-analyses. Higgins et al. (number-4 and number-7) developed a new measure ( $I^2$ ) for quantifying heterogeneity between studies included in a meta-analysis. Stroup et al. (number-12) reported a proposal for reporting meta-analyses of observational studies. The list of the most cited articles also reflects major advances in the management of non-communicable diseases (n=40) and in the identification of their predisposing factors for such diseases over the last 30 years. Baigent and colleagues (number-8) examined the efficacy and safety of statins on cholesterol lowering. Abe and co-researchers examined effects of chemotherapy and hormonal therapy for early breast cancer recurrence (number-10) and Lewington et al. (number-13) examined age-

**Table 1.** The 100 most frequently cited systematic review and meta-analysis articles.

| Articles                                                                                                                                                                                                                                                                                       | Year | Total no. of citations |      | Average citations per year |      |
|------------------------------------------------------------------------------------------------------------------------------------------------------------------------------------------------------------------------------------------------------------------------------------------------|------|------------------------|------|----------------------------|------|
|                                                                                                                                                                                                                                                                                                |      | No                     | Rank | No                         | Rank |
| Dersimonian R, Laird N: <b>Metaanalysis in Clinical-Trials.</b> <i>Controlled Clinical Trials</i> 1986, <b>7</b> : 177-188.                                                                                                                                                                    | 1986 | 7308                   | 1    | 281.1                      | 7    |
| Egger M, Smith GD, Schneider M, Minder C: <b>Bias in meta-analysis detected by a simple, graphical test.</b> <i>British Medical Journal</i> 1997, <b>315</b> : 629-634.                                                                                                                        | 1997 | 5197                   | 2    | 346.5                      | 2    |
| Jadad AR, Moore RA, Carroll D, Jenkinson C, Reynolds DJM, Gavaghan DJ <i>et al.</i> : <b>Assessing the quality of reports of randomized clinical trials: Is blinding necessary?</b> <i>Controlled Clinical Trials</i> 1996, <b>17</b> : 1-12.                                                  | 1996 | 4535                   | 3    | 283.4                      | 6    |
| Higgins JPT, Thompson SG, Deeks JJ, Altman DG: <b>Measuring inconsistency in meta-analyses.</b> <i>British Medical Journal</i> 2003, <b>327</b> : 557-560.                                                                                                                                     | 2003 | 4111                   | 4    | 456.8                      | 1    |
| Schulz KF, Chalmers I, Hayes RJ, Altman DG: <b>Empirical-Evidence of Bias - Dimensions of Methodological Quality Associated with Estimates of Treatment Effects in Controlled Trials.</b> <i>Jama-Journal of the American Medical Association</i> 1995, <b>273</b> : 408-412.                  | 1995 | 2884                   | 5    | 169.6                      | 17   |
| Sackett DL, Rosenberg WMC, Gray JAM, Haynes RB, Richardson WS: <b>Evidence based medicine: What it is and what it isn't - It's about integrating individual clinical expertise and the best external evidence.</b> <i>British Medical Journal</i> 1996, <b>312</b> : 71-72.                    | 1996 | 2881                   | 6    | 180.1                      | 14   |
| Higgins JPT, Thompson SG: <b>Quantifying heterogeneity in a meta-analysis.</b> <i>Statistics in Medicine</i> 2002, <b>21</b> : 1539-1558.                                                                                                                                                      | 2002 | 2755                   | 7    | 275.5                      | 8    |
| Baigent C, Keech A, Kearney PM, Blackwell L, Buck G, Pollicino C <i>et al.</i> : <b>Efficacy and safety of cholesterol-lowering treatment: prospective meta-analysis of data from 90,056 participants in 14 randomised trials of statins.</b> <i>Lancet</i> 2005, <b>366</b> : 1267-1278.      | 2002 | 2640                   | 8    | 264                        | 9    |
| Boushey CJ, Beresford SAA, Omenn GS, Motulsky AG: <b>A Quantitative Assessment of Plasma Homocysteine As A Risk Factor for Vascular-Disease - Probable Benefits of Increasing Folic-Acid Intakes.</b> <i>Jama-Journal of the American Medical Association</i> 1995, <b>274</b> : 1049-1057.    | 1995 | 2532                   | 9    | 148.9                      | 19   |
| Abe O, Abe R, Enomoto K, Kikuchi K, Koyama H, Masuda H <i>et al.</i> : <b>Effects of chemotherapy and hormonal therapy for early breast cancer on recurrence and 15-year survival: an overview of the randomised trials.</b> <i>Lancet</i> 2005, <b>365</b> : 1687-1717.                       | 2005 | 2356                   | 10   | 336.6                      | 3    |
| Moher D, Pham B, Jones A, Cook DJ, Jadad AR, Moher M <i>et al.</i> : <b>Does quality of reports of randomised trials affect estimates of intervention efficacy reported in meta-analyses?</b> <i>Lancet</i> 1998, <b>352</b> : 609-613.                                                        | 1999 | 2335                   | 11   | 179.6                      | 15   |
| Stroup DF, Berlin JA, Morton SC, Olkin I, Williamson GD, Rennie D <i>et al.</i> : <b>Meta-analysis of observational studies in epidemiology - A proposal for reporting.</b> <i>Jama-Journal of the American Medical Association</i> 2000, <b>283</b> : 2008-2012.                              | 2000 | 2335                   | 12   | 194.6                      | 12   |
| Lewington S, Clarke R, Qizilbash N, Peto R, Collins R: <b>Age-specific relevance of usual blood pressure to vascular mortality: a meta-analysis of individual data for one million adults in 61 prospective studies.</b> <i>Lancet</i> 2002, <b>360</b> : 1903-1913.                           | 2002 | 2328                   | 13   | 232.8                      | 10   |
| Alberti W, Anderson G, Bartolucci A, Bell D, Villalba JB, Brodin O <i>et al.</i> : <b>Chemotherapy in Non-Small-Cell Lung-Cancer - A Metaanalysis Using Updated Data on Individual Patients from 52 Randomized Clinical-Trials.</b> <i>British Medical Journal</i> 1995, <b>311</b> : 899-909. | 1995 | 2087                   | 14   | 122.8                      | 24   |
| Baigent C, Sudlow C, Collins R, Peto R: <b>Collaborative meta-analysis of randomised trials of antiplatelet therapy for prevention of death, myocardial infarction, and stroke in high risk patients.</b> <i>British Medical Journal</i> 2002, <b>324</b> : 71-86.                             | 2005 | 2040                   | 15   | 291.4                      | 5    |
| Block G, Patterson B, Subar A: <b>Fruit, Vegetables, and Cancer Prevention - A Review of the Epidemiologic Evidence.</b> <i>Nutrition and Cancer-an International Journal</i> 1992, <b>18</b> : 1-29.                                                                                          | 1992 | 1826                   | 16   | 91.3                       | 35   |
| Begg CB, Mazumdar M: <b>Operating Characteristics of A Bank Correlation Test for Publication Bias.</b> <i>Biometrics</i> 1994, <b>50</b> : 1088-1101.                                                                                                                                          | 1994 | 1756                   | 17   | 97.6                       | 31   |
| Lazarou J, Pomeranz BH, Corey PN: <b>Incidence of adverse drug reactions in hospitalized patients - A meta-analysis of prospective studies.</b> <i>Jama-Journal of the American Medical Association</i> 1998, <b>279</b> : 1200-1205.                                                          | 1998 | 1707                   | 18   | 121.9                      | 25   |
| Buchwald H, Avidor Y, Braunwald E, Jensen MD, Pories W, Fahrenbach K <i>et al.</i> : <b>Bariatric surgery: A systematic review and meta-analysis.</b> <i>Jama-Journal of the American Medical Association</i> 2004, <b>292</b> : 1724-1737.                                                    | 2004 | 1706                   | 19   | 213.3                      | 11   |
| Grady D, Rubin SM, Petitti DB, Fox CS, Black D, Ettinger B <i>et al.</i> : <b>Hormone-Therapy to Prevent Disease and Prolong Life in Postmenopausal Women.</b> <i>Annals of Internal Medicine</i> 1992, <b>117</b> : 1016-1037.                                                                | 1992 | 1702                   | 20   | 85.1                       | 41   |
| Marshall D, Johnell O, Wedel H: <b>Meta-analysis of how well measures of bone mineral density predict occurrence of osteoporotic fractures.</b> <i>British Medical Journal</i> 1996, <b>312</b> : 1254-1259.                                                                                   | 1996 | 1583                   | 21   | 98.9                       | 30   |
| Barrick MR, Mount MK: <b>The Big 5 Personality Dimensions and Job-Performance - A Metaanalysis.</b> <i>Personnel Psychology</i> 1991, <b>44</b> : 1-26.                                                                                                                                        | 1991 | 1582                   | 22   | 75.3                       | 51   |

Table 1 (continued).

| Articles                                                                                                                                                                                                                                                                                                                                   | Year | Total no. of citations                                                                                                                                                                                                                               |      | Average citations per year |      |
|--------------------------------------------------------------------------------------------------------------------------------------------------------------------------------------------------------------------------------------------------------------------------------------------------------------------------------------------|------|------------------------------------------------------------------------------------------------------------------------------------------------------------------------------------------------------------------------------------------------------|------|----------------------------|------|
|                                                                                                                                                                                                                                                                                                                                            |      | No                                                                                                                                                                                                                                                   | Rank | No                         | Rank |
|                                                                                                                                                                                                                                                                                                                                            |      | Davis DA, Thomson MA, Oxman AD, Haynes RB: <b>Changing Physician Performance - A Systematic Review of the Effect of Continuing Medical-Education Strategies.</b> <i>Jama-Journal of the American Medical Association</i> 1995, <b>274</b> : 700-705. | 1995 | 1577                       | 23   |
| Appleby P, Baigent C, Collins R, Flather M, Parish S, Peto R <i>et al.</i> : <b>Indications for Fibrinolytic Therapy in Suspected Acute Myocardial-Infarction - Collaborative Overview of Early Mortality and Major Morbidity Results from All Randomized Trials of More Than 1000 Patients.</b> <i>Lancet</i> 1994, <b>343</b> : 311-322. | 1994 | 1519                                                                                                                                                                                                                                                 | 24   | 84.4                       | 43   |
| Nissen SE, Wolski K: <b>Effect of rosiglitazone on the risk of myocardial infarction and death from cardiovascular causes.</b> <i>New England Journal of Medicine</i> 2007, <b>356</b> : 2457-2471.                                                                                                                                        | 2007 | 1507                                                                                                                                                                                                                                                 | 25   | 301.4                      | 4    |
| Grimshaw JM, Russell IT: <b>Effect of Clinical Guidelines on Medical-Practice - A Systematic Review of Rigorous Evaluations.</b> <i>Lancet</i> 1993, <b>342</b> : 1317-1322.                                                                                                                                                               | 1993 | 1377                                                                                                                                                                                                                                                 | 26   | 72.5                       | 55   |
| Abe O, Abe R, Enomoto K, Kikuchi K, Koyama H, Masuda H <i>et al.</i> : <b>Effects of radiotherapy and of differences in the extent of surgery for early breast cancer on local recurrence and 15-year survival: an overview of the randomised trials.</b> <i>Lancet</i> 2005, <b>366</b> : 2087-2106.                                      | 2005 | 1324                                                                                                                                                                                                                                                 | 27   | 189.1                      | 13   |
| Danesh J, Whincup P, Walker M, Lennon L, Thomson A, Appleby P <i>et al.</i> : <b>Low grade inflammation and coronary heart disease: prospective study and updated meta-analyses.</b> <i>British Medical Journal</i> 2000, <b>321</b> : 199-204.                                                                                            | 2004 | 1277                                                                                                                                                                                                                                                 | 28   | 159.6                      | 18   |
| Farrer LA, Cupples LA, Haines JL, Hyman B, Kukull WA, Mayeux R <i>et al.</i> : <b>Effects of age, sex, and ethnicity on the association between apolipoprotein E genotype and Alzheimer disease - A meta-analysis.</b> <i>Jama-Journal of the American Medical Association</i> 1997, <b>278</b> : 1349-1356.                               | 1997 | 1265                                                                                                                                                                                                                                                 | 29   | 84.3                       | 44   |
| Moher D, Cook DJ, Eastwood S, Olkin I, Rennie D, Stroup DF: <b>Improving the quality of reports of meta-analyses of randomised controlled trials: the QUOROM statement.</b> <i>Lancet</i> 1999, <b>354</b> : 1896-1900.                                                                                                                    | 1998 | 1262                                                                                                                                                                                                                                                 | 30   | 90.1                       | 37   |
| Armitage CJ, Conner M: <b>Efficacy of the theory of planned behaviour: A meta-analytic review.</b> <i>British Journal of Social Psychology</i> 2001, <b>40</b> : 471-499.                                                                                                                                                                  | 2001 | 1234                                                                                                                                                                                                                                                 | 31   | 112.2                      | 28   |
| Dellinger RP, Carlet JM, Masur H, Gerlach H, Calandra T, Cohen J <i>et al.</i> : <b>Surviving Sepsis Campaign guidelines for management of severe sepsis and septic shock.</b> <i>Critical Care Medicine</i> 2004, <b>32</b> : 858-873.                                                                                                    | 2004 | 1172                                                                                                                                                                                                                                                 | 32   | 146.5                      | 20   |
| Pignon JP, Bourhis J, Domenge C, Designe L: <b>Chemotherapy added to locoregional treatment for head and neck squamous-cell carcinoma: three meta-analyses of updated individual data.</b> <i>Lancet</i> 2000, <b>355</b> : 949-955.                                                                                                       | 2000 | 1155                                                                                                                                                                                                                                                 | 33   | 96.3                       | 32   |
| Guyatt G: <b>Evidence-Based Medicine - A New Approach to Teaching the Practice of Medicine.</b> <i>Jama-Journal of the American Medical Association</i> 1992, <b>268</b> : 2420-2425.                                                                                                                                                      | 1992 | 1145                                                                                                                                                                                                                                                 | 34   | 57.3                       | 66   |
| Phan KL, Wager T, Taylor SF, Liberzon I: <b>Functional neuroanatomy of emotion: A meta-analysis of emotion activation studies in PET and fMRI.</b> <i>Neuroimage</i> 2002, <b>16</b> : 331-348.                                                                                                                                            | 2002 | 1136                                                                                                                                                                                                                                                 | 35   | 113.6                      | 27   |
| Kramer MS: <b>Determinants of Low Birth-Weight - Methodological Assessment and Meta-Analysis.</b> <i>Bulletin of the World Health Organization</i> 1987, <b>65</b> : 663-737.                                                                                                                                                              | 2003 | 1130                                                                                                                                                                                                                                                 | 36   | 125.6                      | 23   |
| Lohmueller KE, Pearce CL, Pike M, Lander ES, Hirschhorn JN: <b>Meta-analysis of genetic association studies supports a contribution of common variants to susceptibility to common disease.</b> <i>Nature Genetics</i> 2003, <b>33</b> : 177-182.                                                                                          | 1987 | 1130                                                                                                                                                                                                                                                 | 37   | 45.2                       | 81   |
| Easterbrook PJ, Berlin JA, Gopalan R, Matthews DR: <b>Publication Bias in Clinical Research.</b> <i>Lancet</i> 1991, <b>337</b> : 867-872.                                                                                                                                                                                                 | 1991 | 1119                                                                                                                                                                                                                                                 | 38   | 53.3                       | 73   |
| Anderson JW, Johnstone BM, Cooknewell ME: <b>Metaanalysis of the Effects of Soy Protein-Intake on Serum-Lipids.</b> <i>New England Journal of Medicine</i> 1995, <b>333</b> : 276-282.                                                                                                                                                     | 1995 | 1113                                                                                                                                                                                                                                                 | 39   | 65.5                       | 60   |
| Danesh J, Collins R, Appleby P, Peto R: <b>Association of fibrinogen, C-reactive protein, albumin, or leukocyte count with coronary heart disease - Meta-analyses of prospective studies.</b> <i>Jama-Journal of the American Medical Association</i> 1998, <b>279</b> : 1477-1482.                                                        | 1998 | 1102                                                                                                                                                                                                                                                 | 40   | 78.7                       | 48   |
| Juni P, Witschi A, Bloch R, Egger M: <b>The hazards of scoring the quality of clinical trials for meta-analysis.</b> <i>Jama-Journal of the American Medical Association</i> 1999, <b>282</b> : 1054-1060.                                                                                                                                 | 2001 | 1058                                                                                                                                                                                                                                                 | 41   | 96.2                       | 33   |
| Atkins D, Best D, Briss PA, Eccles M, Falck-Ytter Y, Flottorp S <i>et al.</i> : <b>Grading quality of evidence and strength of recommendations.</b> <i>British Medical Journal</i> 2004, <b>328</b> : 1490-1494.                                                                                                                           | 2004 | 1012                                                                                                                                                                                                                                                 | 42   | 126.5                      | 22   |
| Smith ML, Glass GV: <b>Meta-Analysis of Psychotherapy Outcome Studies.</b> <i>American Psychologist</i> 1977, <b>32</b> : 752-760.                                                                                                                                                                                                         | 1977 | 979                                                                                                                                                                                                                                                  | 43   | 28                         | 99   |
| Brewin CR, Andrews B, Valentine JD: <b>Meta-analysis of risk factors for posttraumatic stress disorder in trauma-exposed adults.</b> <i>Journal of Consulting and Clinical Psychology</i> 2000, <b>68</b> : 748-766.                                                                                                                       | 2000 | 972                                                                                                                                                                                                                                                  | 44   | 81                         | 46   |
| Bero LA, Grilli R, Grimshaw JM, Harvey E, Oxman AD, Thomson MA: <b>Getting research findings into practice - Closing the gap between research and practice: an overview of systematic reviews of interventions to promote the implementation of research findings.</b> <i>British Medical Journal</i> 1998, <b>317</b> : 465-468.          | 1998 | 964                                                                                                                                                                                                                                                  | 45   | 68.9                       | 57   |
| Dickersin K, Scherer R, Lefebvre C: <b>Systematic Reviews - Identifying Relevant Studies for Systematic Reviews.</b> <i>British Medical Journal</i> 1994, <b>309</b> : 1286-1291.                                                                                                                                                          | 1994 | 952                                                                                                                                                                                                                                                  | 46   | 52.9                       | 74   |

Table 1 (continued).

| Articles                                                                                                                                                                                                                                                                                                                                                        | Year | Total no. of citations                                                                                                                                                              |      | Average citations per year |      |
|-----------------------------------------------------------------------------------------------------------------------------------------------------------------------------------------------------------------------------------------------------------------------------------------------------------------------------------------------------------------|------|-------------------------------------------------------------------------------------------------------------------------------------------------------------------------------------|------|----------------------------|------|
|                                                                                                                                                                                                                                                                                                                                                                 |      | No                                                                                                                                                                                  | Rank | No                         | Rank |
|                                                                                                                                                                                                                                                                                                                                                                 |      | Anderson RJ, Freedland KE, Clouse RE, Lustman PJ: <b>The prevalence of comorbid depression in adults with diabetes - A meta-analysis.</b> <i>Diabetes Care</i> 2001, 24: 1069-1078. | 2001 | 933                        | 47   |
| Oxman AD, Thomson MA, Davis DA, Haynes RB: <b>No Magic Bullets - A Systematic Review of 102 Trials of Interventions to Improve Professional Practice.</b> <i>Canadian Medical Association Journal</i> 1995, 153: 1423-1431.                                                                                                                                     | 1995 | 928                                                                                                                                                                                 | 48   | 54.6                       | 72   |
| Ohara MW, Swain AM: <b>Rates and risk of postpartum depression - A meta-analysis.</b> <i>International Review of Psychiatry</i> 1996, 8: 37-54.                                                                                                                                                                                                                 | 1996 | 913                                                                                                                                                                                 | 49   | 57.1                       | 67   |
| Clarke R, Collins R, Lewington S, Donald A, Alifthan G, Tuomilehto J <i>et al.</i> : <b>Homocysteine and risk of ischemic heart disease and stroke - A meta-analysis.</b> <i>Jama-Journal of the American Medical Association</i> 2002, 288: 2015-2022.                                                                                                         | 2002 | 910                                                                                                                                                                                 | 50   | 91                         | 36   |
| DiMatteo MR, Lepper HS, Croghan TW: <b>Depression is a risk factor for noncompliance with medical treatment - Meta-analysis of the effects of anxiety and depression on patient adherence.</b> <i>Archives of Internal Medicine</i> 2000, 160: 2101-2107.                                                                                                       | 2000 | 900                                                                                                                                                                                 | 51   | 75                         | 52   |
| Colditz GA, Brewer TF, Berkey CS, Wilson ME, Burdick E, Fineberg HV <i>et al.</i> : <b>Efficacy of Bcg Vaccine in the Prevention of Tuberculosis - Metaanalysis of the Published Literature.</b> <i>Jama-Journal of the American Medical Association</i> 1994, 271: 698-702.                                                                                    | 1994 | 890                                                                                                                                                                                 | 52   | 49.4                       | 79   |
| Wald DS, Law M, Morris JK: <b>Homocysteine and cardiovascular disease: evidence on causality from a meta-analysis.</b> <i>British Medical Journal</i> 2002, 325: 1202-1206K.                                                                                                                                                                                    | 2002 | 872                                                                                                                                                                                 | 53   | 87.2                       | 39   |
| Danesh J, Wheeler JG, Hirschfeld GM, Eda S, Eiriksdottir G, Rumley A <i>et al.</i> : <b>C-reactive protein and other circulating markers of inflammation in the prediction of coronary heart disease.</b> <i>New England Journal of Medicine</i> 2004, 350: 1387-1397.                                                                                          | 2000 | 860                                                                                                                                                                                 | 54   | 71.7                       | 56   |
| Gabriel SE, Jaakkimainen L, Bombardier C: <b>Risk for Serious Gastrointestinal Complications Related to Use of Nonsteroidal Antiinflammatory Drugs - A Metaanalysis.</b> <i>Annals of Internal Medicine</i> 1991, 115: 787-796.                                                                                                                                 | 1991 | 854                                                                                                                                                                                 | 55   | 40.7                       | 88   |
| Harris EC, Barraclough B: <b>Suicide as an outcome for mental disorders - A meta-analysis.</b> <i>British Journal of Psychiatry</i> 1997, 170: 205-228.                                                                                                                                                                                                         | 1997 | 850                                                                                                                                                                                 | 56   | 56.7                       | 69   |
| Linn MC, Petersen AC: <b>Emergence and Characterization of Sex-Differences in Spatial Ability - A Meta-Analysis.</b> <i>Child Development</i> 1985, 56: 1479-1498.                                                                                                                                                                                              | 1985 | 850                                                                                                                                                                                 | 57   | 31.5                       | 98   |
| Bongartz T, Sutton AJ, Sweeting MJ, Buchan I, Matteson EL, Montori V: <b>Anti-TNF antibody therapy in rheumatoid arthritis and the risk of serious infections and malignancies - Systematic review and meta-analysis of rare harmful effects in randomized controlled trials.</b> <i>Jama-Journal of the American Medical Association</i> 2006, 295: 2275-2285. | 2006 | 846                                                                                                                                                                                 | 58   | 141                        | 21   |
| McGeer PL, Schulzer M, McGeer EG: <b>Arthritis and anti-inflammatory agents as possible protective factors for Alzheimer's disease: A review of 17 epidemiologic studies.</b> <i>Neurology</i> 1996, 47: 425-432.                                                                                                                                               | 1996 | 826                                                                                                                                                                                 | 59   | 51.6                       | 77   |
| Mensink RP, Katan MB: <b>Effect of Dietary Fatty-Acids on Serum-Lipids and Lipoproteins - A Metaanalysis of 27 Trials.</b> <i>Arteriosclerosis and Thrombosis</i> 1992, 12: 911-919.                                                                                                                                                                            | 1992 | 822                                                                                                                                                                                 | 60   | 41.1                       | 87   |
| Sheppard BH, Hartwick J, Warshaw PR: <b>The Theory of Reasoned Action - A Meta-Analysis of Past Research with Recommendations for Modifications and Future-Research.</b> <i>Journal of Consumer Research</i> 1988, 15: 325-343.                                                                                                                                 | 1988 | 822                                                                                                                                                                                 | 61   | 34.3                       | 95   |
| Strong WB, Malina RM, Blimkie CJR, Daniels SR, Dishman RK, Gutin B <i>et al.</i> : <b>Evidence based physical activity for school-age youth.</b> <i>Journal of Pediatrics</i> 2005, 146: 732-737.                                                                                                                                                               | 2005 | 815                                                                                                                                                                                 | 62   | 116.4                      | 26   |
| Colquitt JA, Conlon DE, Wesson MJ, Porter COLH, Ng KY: <b>Justice at the millennium: A meta-analytic review of 25 years of organizational justice research.</b> <i>Journal of Applied Psychology</i> 2001, 86: 425-445.                                                                                                                                         | 2001 | 811                                                                                                                                                                                 | 63   | 73.7                       | 54   |
| Sacks HS, Berrier J, Reitman D, Anconaberk VA, Chalmers TC: <b>Meta-Analyses of Randomized Controlled Trials.</b> <i>New England Journal of Medicine</i> 1987, 316: 450-455.                                                                                                                                                                                    | 1987 | 810                                                                                                                                                                                 | 64   | 32.4                       | 97   |
| Llovet JM, Bruix J: <b>Systematic review of randomized trials for unresectable hepatocellular carcinoma: Chemoembolization improves survival.</b> <i>Hepatology</i> 2003, 37: 429-442.                                                                                                                                                                          | 2003 | 804                                                                                                                                                                                 | 65   | 89.3                       | 38   |
| Peyron R, Laurent B, Garcia-Larrea L: <b>Functional imaging of brain responses to pain. A review and meta-analysis (2000).</b> <i>Neurophysiologie Clinique-Clinical Neurophysiology</i> 2000, 30: 263-288.                                                                                                                                                     | 2000 | 801                                                                                                                                                                                 | 66   | 66.8                       | 58   |
| Lipsey MW, Wilson DB: <b>The Efficacy of Psychological, Educational, and Behavioral Treatment - Confirmation from Metaanalysis.</b> <i>American Psychologist</i> 1993, 48: 1181-1209.                                                                                                                                                                           | 1993 | 797                                                                                                                                                                                 | 67   | 41.9                       | 85   |
| Dahlof B, Pennert K, Hansson L: <b>Reversal of Left-Ventricular Hypertrophy in Hypertensive Patients - A Metaanalysis of 109 Treatment Studies.</b> <i>American Journal of Hypertension</i> 1992, 5: 95-110.                                                                                                                                                    | 1992 | 796                                                                                                                                                                                 | 68   | 39.8                       | 89   |
| Ernst E, Resch KL: <b>Fibrinogen As A Cardiovascular Risk Factor - A Metaanalysis and Review of the Literature.</b> <i>Annals of Internal Medicine</i> 1993, 118: 956-963.                                                                                                                                                                                      | 1993 | 794                                                                                                                                                                                 | 69   | 41.8                       | 86   |



Table 1 (continued).

| Articles                                                                                                                                                                                                                                                                                              | Year | Total no. of citations                                                                                                                                                                                                                                                                                   |      | Average citations per year |      |
|-------------------------------------------------------------------------------------------------------------------------------------------------------------------------------------------------------------------------------------------------------------------------------------------------------|------|----------------------------------------------------------------------------------------------------------------------------------------------------------------------------------------------------------------------------------------------------------------------------------------------------------|------|----------------------------|------|
|                                                                                                                                                                                                                                                                                                       |      | No                                                                                                                                                                                                                                                                                                       | Rank | No                         | Rank |
|                                                                                                                                                                                                                                                                                                       |      | Antman EM, Lau J, Kupelnick B, Mosteller F, Chalmers TC: <b>A Comparison of Results of Metaanalyses of Randomized Control Trials and Recommendations of Clinical Experts - Treatments for Myocardial-Infarction.</b> <i>Jama-Journal of the American Medical Association</i> 1992, <b>268</b> : 240-248. | 1992 | 782                        | 70   |
| Patrick DL, Cheadle A, Thompson DC, Diehr P, Koepsell T, Kinne S: <b>The Validity of Self-Reported Smoking - A Review and Metaanalysis.</b> <i>American Journal of Public Health</i> 1994, <b>84</b> : 1086-1093.                                                                                     | 1994 | 777                                                                                                                                                                                                                                                                                                      | 71   | 43.2                       | 83   |
| Maron BJ: <b>Hypertrophic cardiomyopathy - A systematic review.</b> <i>Jama-Journal of the American Medical Association</i> 2002, <b>287</b> : 1308-1320.                                                                                                                                             | 2002 | 773                                                                                                                                                                                                                                                                                                      | 72   | 77.3                       | 49   |
| Miller ER, Pastor-Barriuso R, Dalal D, Riemersma RA, Appel LJ, Guallar E: <b>Meta-analysis: High-dosage vitamin E supplementation may increase all-cause mortality.</b> <i>Annals of Internal Medicine</i> 2005, <b>142</b> : 37-46.                                                                  | 2005 | 764                                                                                                                                                                                                                                                                                                      | 73   | 109.1                      | 29   |
| Wright IC, Rabe-Hesketh S, Woodruff PWR, David AS, Murray RM, Bullmore ET: <b>Meta-analysis of regional brain volumes in schizophrenia.</b> <i>American Journal of Psychiatry</i> 2000, <b>157</b> : 16-25.                                                                                           | 2000 | 763                                                                                                                                                                                                                                                                                                      | 74   | 63.6                       | 62   |
| Horvath AO, Symonds BD: <b>Relation Between Working Alliance and Outcome in Psychotherapy - A Metaanalysis.</b> <i>Journal of Counseling Psychology</i> 1991, <b>38</b> : 139-149.                                                                                                                    | 1991 | 761                                                                                                                                                                                                                                                                                                      | 75   | 36.2                       | 94   |
| Voyer D, Voyer S, Bryden MP: <b>Magnitude of Sex-Differences in Spatial Abilities - A Metaanalysis and Consideration of Critical Variables.</b> <i>Psychological Bulletin</i> 1995, <b>117</b> : 250-270.                                                                                             | 1995 | 756                                                                                                                                                                                                                                                                                                      | 76   | 44.5                       | 82   |
| Wong DKH, Cheung AM, Orourke K, Naylor CD, Detsky AS, Heathcote J: <b>Effect of Alpha-Interferon Treatment in Patients with Hepatitis-B E-Antigen-Positive Chronic Hepatitis-B - A Metaanalysis.</b> <i>Annals of Internal Medicine</i> 1993, <b>119</b> : 312-323.                                   | 1993 | 752                                                                                                                                                                                                                                                                                                      | 77   | 39.6                       | 90   |
| Capes SE, Hunt D, Malmberg K, Gerstein HC: <b>Stress hyperglycaemia and increased risk of death after myocardial infarction in patients with and without diabetes: a systematic overview.</b> <i>Lancet</i> 2000, <b>355</b> : 773-778.                                                               | 2000 | 746                                                                                                                                                                                                                                                                                                      | 78   | 62.2                       | 64   |
| Moore FA, Feliciano DV, Andrassy RJ, Mardle AH, Booth FVM, Morgensteinwagner TB <i>et al.</i> : <b>Early Enteral Feeding, Compared with Parenteral, Reduces Postoperative Septic Complications - the Results of A Metaanalysis.</b> <i>Annals of Surgery</i> 1992, <b>216</b> : 172-183.              | 1992 | 740                                                                                                                                                                                                                                                                                                      | 79   | 37                         | 93   |
| Juni P, Altman DG, Egger M: <b>Systematic reviews in health care - Assessing the quality of controlled clinical trials.</b> <i>British Medical Journal</i> 2001, <b>323</b> : 42-46.                                                                                                                  | 1999 | 737                                                                                                                                                                                                                                                                                                      | 80   | 56.7                       | 68   |
| Lijmer JG, Mol BW, Heisterkamp S, Bossel GJ, Prins MH, van der Meulen JHP <i>et al.</i> : <b>Empirical evidence of design-related bias in studies of diagnostic tests.</b> <i>Jama-Journal of the American Medical Association</i> 1999, <b>282</b> : 1061-1066.                                      | 1999 | 731                                                                                                                                                                                                                                                                                                      | 81   | 56.2                       | 70   |
| Ozer EJ, Best SR, Lipsey TL, Weiss DS: <b>Predictors of posttraumatic stress disorder and symptoms in adults: A meta-analysis.</b> <i>Psychological Bulletin</i> 2003, <b>129</b> : 52-73.                                                                                                            | 2003 | 730                                                                                                                                                                                                                                                                                                      | 82   | 81.1                       | 45   |
| Wellman HM, Cross D, Watson J: <b>Meta-analysis of theory-of-mind development: The truth about false belief.</b> <i>Child Development</i> 2001, <b>72</b> : 655-684.                                                                                                                                  | 2001 | 728                                                                                                                                                                                                                                                                                                      | 83   | 66.2                       | 59   |
| Cosgrove SE, Sakoulas G, Perencevich EN, Schwaber MJ, Karchmer AW, Carmeli Y: <b>Comparison of mortality associated with methicillin-resistant and methicillin-susceptible <i>Staphylococcus aureus</i> bacteremia: A meta-analysis.</b> <i>Clinical Infectious Diseases</i> 2003, <b>36</b> : 53-59. | 2003 | 725                                                                                                                                                                                                                                                                                                      | 84   | 80.6                       | 47   |
| Hart RG, Benavente O, McBride R, Pearce LA: <b>Antithrombotic therapy to prevent stroke in patients with atrial fibrillation: A meta-analysis.</b> <i>Annals of Internal Medicine</i> 1999, <b>131</b> : 492-501                                                                                      | 1999 | 717                                                                                                                                                                                                                                                                                                      | 85   | 55.2                       | 71   |
| Berlin JA, Colditz GA: <b>A Metaanalysis of Physical-Activity in the Prevention of Coronary Heart-Disease.</b> <i>American Journal of Epidemiology</i> 1990, <b>132</b> : 612-628.                                                                                                                    | 1990 | 713                                                                                                                                                                                                                                                                                                      | 86   | 32.4                       | 96   |
| Eaden JA, Abrams KR, Mayberry JF: <b>The risk of colorectal cancer in ulcerative colitis: a meta-analysis.</b> <i>Gut</i> 2001, <b>48</b> : 526-535.                                                                                                                                                  | 2001 | 711                                                                                                                                                                                                                                                                                                      | 87   | 64.6                       | 61   |
| Neal B, MacMahon S, Chapman N, Cutler J, Fagard R, Neal B <i>et al.</i> : <b>Effects of ACE inhibitors, calcium antagonists, and other blood-pressure-lowering drugs: results of prospectively designed overviews of randomised trials.</b> <i>Lancet</i> 2000, <b>356</b> : 1955-1964.               | 2000 | 709                                                                                                                                                                                                                                                                                                      | 88   | 59.1                       | 65   |
| Stuck AE, Siu AL, Wieland GD, Adams J, Rubenstein LZ: <b>Comprehensive Geriatric Assessment - A Metaanalysis of Controlled Trials.</b> <i>Lancet</i> 1993, <b>342</b> : 1032-1036.                                                                                                                    | 1993 | 709                                                                                                                                                                                                                                                                                                      | 89   | 37.3                       | 92   |
| Zeggini E, Scott LJ, Saxena R, Voight BF, Marchini JL, Hu T <i>et al.</i> : <b>Meta-analysis of genome-wide association data and large-scale replication identifies additional susceptibility loci for type 2 diabetes.</b> <i>Nature Genetics</i> 2008, <b>40</b> : 638-645.                         | 2008 | 706                                                                                                                                                                                                                                                                                                      | 90   | 176.5                      | 16   |
| Brattstrom L, Landgren F, Israelsson B, Lindgren A, Hultberg B, Andersson A <i>et al.</i> : <b>Lowering blood homocysteine with folic acid based supplements: meta-analysis of randomised trials.</b> <i>British Medical Journal</i> 1998, <b>316</b> : 894-898.                                      | 1998 | 697                                                                                                                                                                                                                                                                                                      | 91   | 49.8                       | 78   |
| Labbe KA, Detsky AS, Orourke K: <b>Metaanalysis in Clinical Research.</b> <i>Annals of Internal Medicine</i> 1987, <b>107</b> : 224-233.                                                                                                                                                              | 1987 | 694                                                                                                                                                                                                                                                                                                      | 92   | 27.8                       | 100  |
| Hites RA: <b>Polybrominated diphenyl ethers in the environment and in people: A meta-analysis of concentrations.</b> <i>Environmental Science &amp; Technology</i> 2004, <b>38</b> : 945-956.                                                                                                         | 2004 | 692                                                                                                                                                                                                                                                                                                      | 93   | 86.5                       | 40   |

Table 1 (continued).

| Articles                                                                                                                                                                                                                                                      | Year | Total no. of citations |      | Average citations per year |      |
|---------------------------------------------------------------------------------------------------------------------------------------------------------------------------------------------------------------------------------------------------------------|------|------------------------|------|----------------------------|------|
|                                                                                                                                                                                                                                                               |      | No                     | Rank | No                         | Rank |
| Claxton AJ, Cramer J, Pierce C: A <b>systematic review of the associations between dose regimens and medication compliance</b> . <i>Clinical Therapeutics</i> 2001, 23: 1296-1310.                                                                            | 2001 | 691                    | 94   | 62.8                       | 63   |
| Lexchin J, Bero LA, Djulbegovic B, Clark O: <b>Pharmaceutical industry sponsorship and research outcome and quality: systematic review</b> . <i>British Medical Journal</i> 2003, 326: 1167-1170B.                                                            | 2003 | 689                    | 95   | 76.6                       | 50   |
| Hunt DL, Haynes RB, Hanna SE, Smith K: <b>Effects of computer-based clinical decision support systems on physician performance and patient outcomes - A systematic review</b> . <i>Jama-Journal of the American Medical Association</i> 1998, 280: 1339-1346. | 1998 | 687                    | 96   | 49.1                       | 80   |
| Deci EL, Koestner R, Ryan RM: <b>A meta-analytic review of experiments examining the effects of extrinsic rewards on intrinsic motivation</b> . <i>Psychological Bulletin</i> 1999, 125: 627-668.                                                             | 1999 | 685                    | 97   | 52.7                       | 75   |
| Larosa JC, He J, Vupputuri S: <b>Effect of statins on risk of coronary disease - A meta-analysis of randomized controlled trials</b> . <i>Jama-Journal of the American Medical Association</i> 1999, 282: 2340-2346.                                          | 1999 | 680                    | 98   | 52.3                       | 76   |
| Kluger AN, DeNisi A: <b>The effects of feedback interventions on performance: A historical review, a meta-analysis, and a preliminary feedback intervention theory</b> . <i>Psychological Bulletin</i> 1996, 119: 254-284.                                    | 1996 | 677                    | 99   | 42.3                       | 84   |
| Lewis CM, Levinson DF, Wise LH, Delisi LE, Straub RE, Hovatta I <i>et al.</i> : <b>Genome scan meta-analysis of schizophrenia and bipolar disorder, part II: Schizophrenia</b> . <i>American Journal of Human Genetics</i> 2003, 73: 34-48.                   | 2003 | 675                    | 100  | 75                         | 53   |

doi: 10.1371/journal.pone.0078517.t001

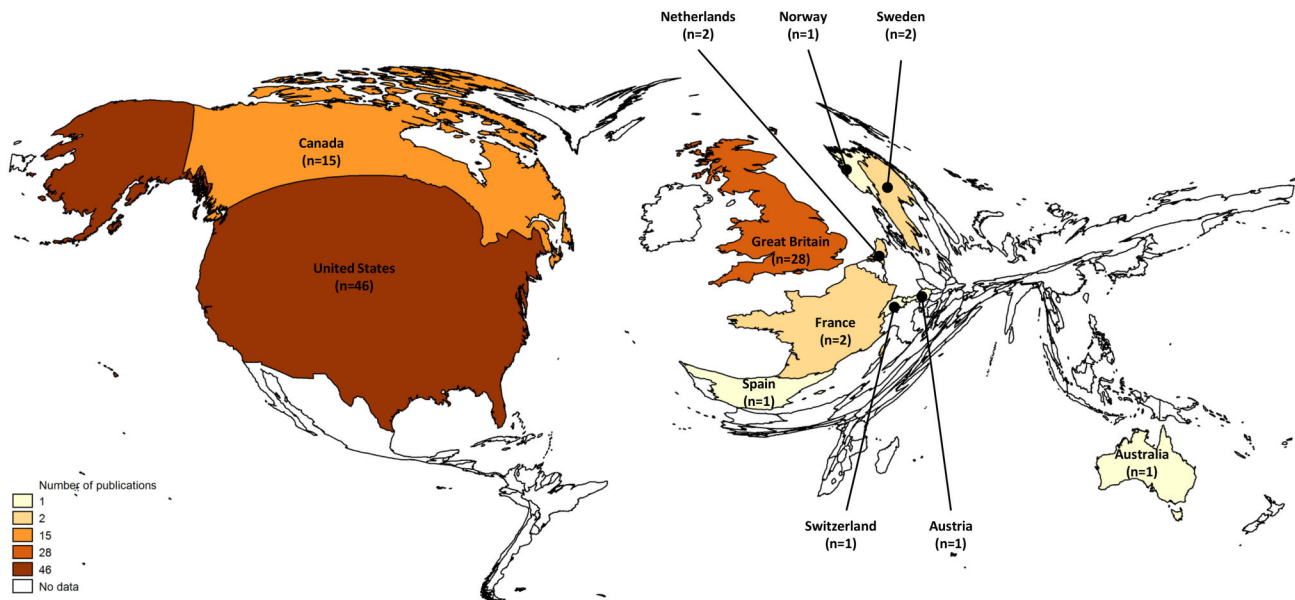

**Figure 1. Spatial distribution of the 100 most frequently cited systematic reviews and meta-analyses related articles using density equalizing mapping.** The area of each country were re-sized in proportion to its total number of 100 most frequently cited systematic reviews and meta-analyses related articles.

doi: 10.1371/journal.pone.0078517.g001

specific relevance of usual blood pressure and vascular mortality.

## Discussion

This study identified and characterised the 100 most cited SRM related articles published in the past three decades,

providing an overview of the citation frequency of these most cited articles. The list of the most cited articles identifies first authors and topics which reflect advances in methodological techniques in meta-analysis, major advances in the management of chronic diseases, and identification of predisposing factors over the last 30 years. Some of the most frequently cited articles were methodological papers. As

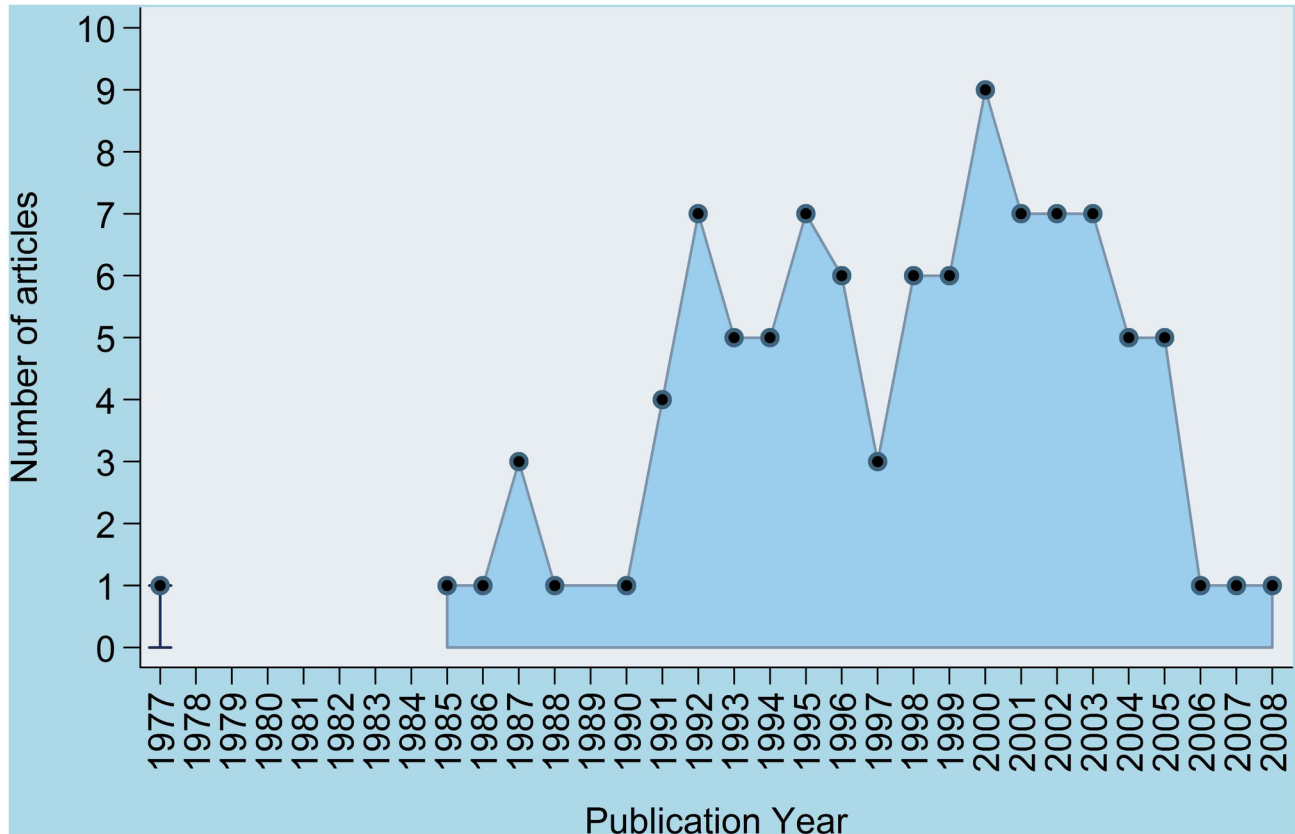

**Figure 2. Graph demonstrating the time period of publication of the 100 most cited systematic reviews and meta-analyses related articles.**

doi: 10.1371/journal.pone.0078517.g002

expected the most highly cited papers were more likely to be published in journals high on the impact factor list [13,14]. It is important to note that, at present, no Cochrane review is among the 100 most cited SRM related articles. Cochrane reviews are systematic reviews of primary research in human health care and health policy, and are internationally recognised as the highest standard in evidence-based health care [15,16]. They investigate the effects of interventions for prevention, treatment and rehabilitation [15,16]. They also assess the accuracy of a diagnostic test for a given condition in a specific patient group and setting. They are published online in The Cochrane Library [15,16]. The low citations received by Cochrane reviews may be due to improper citations of Cochrane reviews, and the relatively recent tracking of Cochrane reviews by ISI. In addition, ISI Science Citation Index database covers all new and substantially updated Cochrane reviews from January 2005, and the first impact factor for Cochrane Database of Systematic Review was released in June 2008.

We found that almost half of the most cited SRM related articles originated in the US. This Figure is comparable with the origin of citation classics in other fields [5–9]. The overwhelming influence the US has on medical research may be due to its large underlying population, enormous financial

resources available to the scientific community in the country and its high population of active citing researchers compared to other countries [6,7]. Studies have demonstrated that biomedical research productivity worldwide is largely dependent on each country's per capita gross national product and the expenditure allotted for research and development [17,18].

Our results support previous findings [5–9] that first authors from Africa, Asia, and South America had minimal or no contributions in the most cited articles. Scientific publishing activity worldwide over the past decades shows that most countries in these regions have low levels of publication [19]. The above finding is not a surprise because difficulties in research, publication, information access, and language barriers facing the least-developed countries are profound and seem almost intractable. Most information published in journals based in low and middle-income countries (LMICs) never leaves their home borders because these journals are largely excluded from major bibliographic databases. In addition, most of the reviews produced to date address health conditions that are priorities in the developed world[20]. Many major health concerns in LMICs have yet to be made the subject of a citation classic review, although there are signs that this may be changing[21].



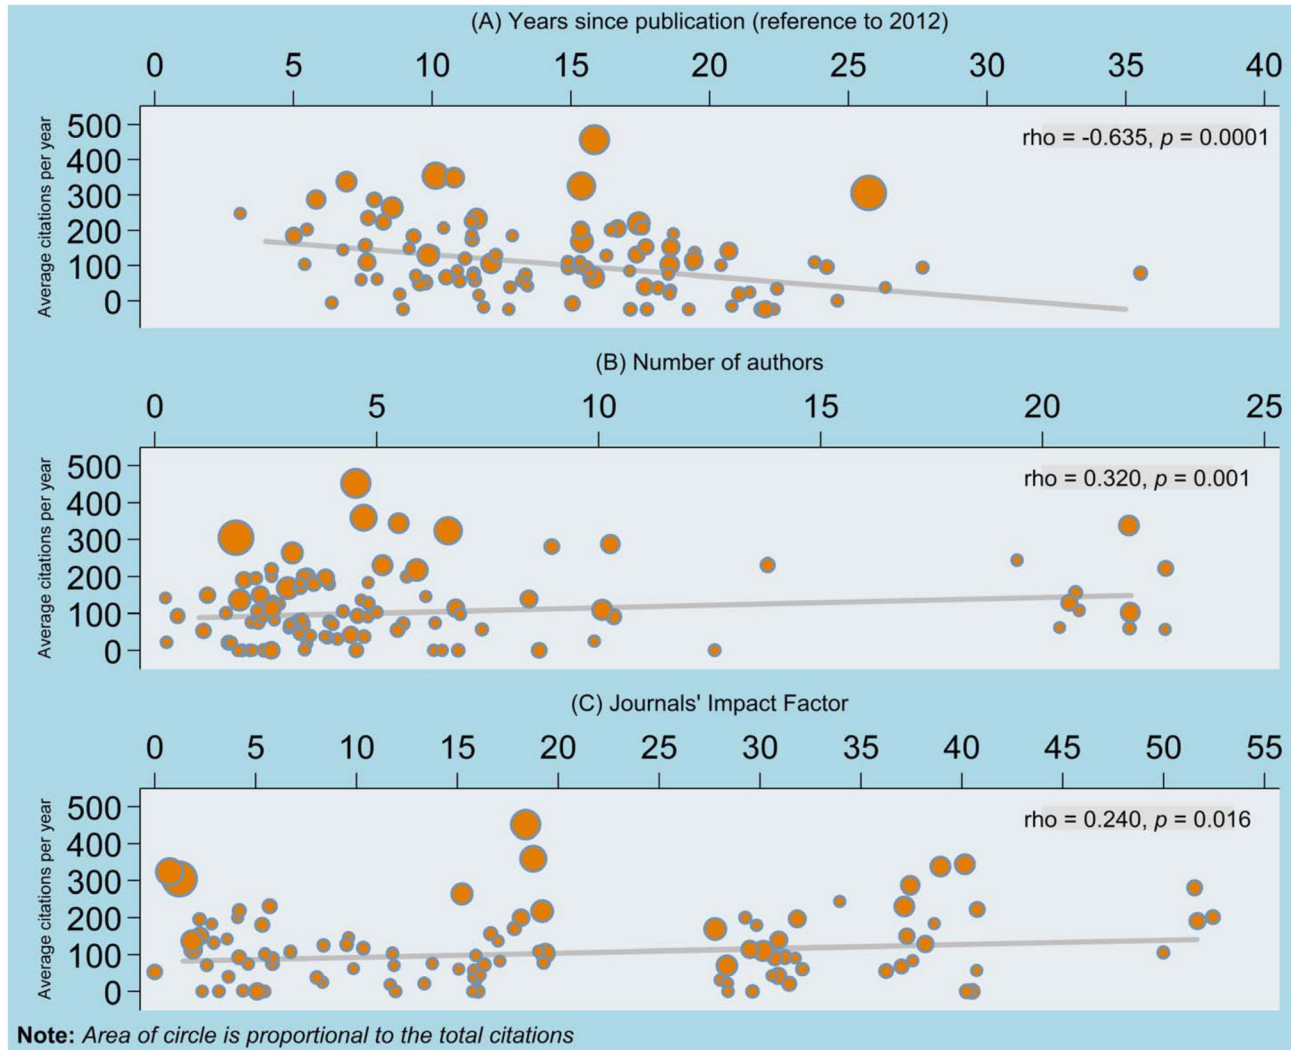

**Figure 3. Correlation between since publication, number of authors, journals' impact factor and average citation per year.**

doi: 10.1371/journal.pone.0078517.g003

In addition, the difficulties of conducting randomised controlled trials and other high quality studies in resource-poor situations result in the exclusion of many LMIC studies from systematic reviews [22]. However, there is a need to challenge the status quo. Scientists from these regions should forge multiple collaborations beyond historical, political, and cultural lines to share knowledge and expertise on SRM. In addition, there is a need to promote research in SRM in less developed regions of the world. This may involve but is not limited to the political will for research capacity development among LMIC health policymakers, the training of LMIC researchers to be competent in systematic review techniques, the development of infrastructure including research and academic institutes, the improvement of current collaborative partnerships with developed nations, increased sponsorship and support from world agencies such as the World Health Organization and the United Nations Organization.

Although we have tried to eliminate potential flaws in our citation analysis, some limitations were inevitable and are linked to the inherent problems of citation analysis [23,24]. The citation of a scientific article usually follows a time course, it is usually not cited until one to two years after publication, reaches a maximum after three to ten years, then declines [6]. Another problem is oriented or biased citing, including various types of conscious or unconscious biases, such as self-citation (bias towards one's own work), in-house (bias towards friends or colleagues), journal or powerful person (bias towards reviewers, editors, members of grant awarding bodies), negative citation (bias towards potential negative credits), English language (bias towards publishing and referencing English articles), and omission bias (bias towards not referencing competitors or sources contradictory to one's own results) [25]. Other limitations include the incorrect citation of origin for the authors. By using the author addresses listed in

**Table 2.** Journals in which the most cited articles were published.

| Journal title                                      | Number of articles | Impact factor (2012) |
|----------------------------------------------------|--------------------|----------------------|
| Journal of The American Medical Association        | 18                 | 29.978               |
| British Medical Journal                            | 14                 | 17.215               |
| Lancet                                             | 13                 | 39.06                |
| Annals of Internal Medicine                        | 7                  | 13.976               |
| New England Journal of Medicine                    | 4                  | 51.658               |
| Psychological Bulletin                             | 4                  | 15.575               |
| American Psychologist                              | 2                  | 5.1                  |
| Child Development                                  | 2                  | 4.915                |
| Controlled Clinical Trials                         | 2                  | 1.597                |
| Nature Genetics                                    | 2                  | 35.209               |
| American Journal of Epidemiology                   | 1                  | 4.78                 |
| American Journal of Human Genetics                 | 1                  | 11.202               |
| American Journal of Hypertension                   | 1                  | 3.665                |
| American Journal of Psychiatry                     | 1                  | 14.721               |
| American Journal of Public Health                  | 1                  | 3.93                 |
| Annals of Surgery                                  | 1                  | 6.329                |
| Archives of Internal Medicine                      | 1                  | 11.462               |
| Arteriosclerosis And Thrombosis                    | 1                  | 6.338                |
| Biometrics                                         | 1                  | 1.412                |
| British Journal of Psychiatry                      | 1                  | 6.606                |
| British Journal of Social Psychology               | 1                  | 1.816                |
| Bulletin of The World Health Organization          | 1                  | 5.25                 |
| Canadian Medical Association Journal               | 1                  | 6.465                |
| Clinical Infectious Diseases                       | 1                  | 9.374                |
| Clinical Therapeutics                              | 1                  | 2.23                 |
| Critical Care Medicine                             | 1                  | 6.124                |
| Diabetes Care                                      | 1                  | 7.735                |
| Environmental Science Technology                   | 1                  | 5.257                |
| Gut                                                | 1                  | 10.732               |
| Hepatology                                         | 1                  | 12.003               |
| International Review of Psychiatry                 | 1                  | 1.608                |
| Journal of Applied Psychology                      | 1                  | 4.758                |
| Journal of Consulting And Clinical Psychology      | 1                  | 5.011                |
| Journal of Consumer Research                       | 1                  | 3.542                |
| Journal of Counseling Psychology                   | 1                  | 2.628                |
| Journal of Pediatrics                              | 1                  | 4.035                |
| Neuroimage                                         | 1                  | 6.252                |
| Neurology                                          | 1                  | 8.249                |
| Neurophysiologie Clinique Clinical Neurophysiology | 1                  | 2.553                |
| Nutrition and Cancer An International Journal      | 1                  | 2.695                |
| Personnel Psychology                               | 1                  | 3.702                |
| Statistics In Medicine                             | 1                  | 2.044                |

doi: 10.1371/journal.pone.0078517.t002

the bylines of research articles, one can only identify countries and organizations where the authors were employed when the research was done or where the article was written [18].

## Conclusion

Since the late 1970s, the USA, UK, and Canada have taken leadership in the production of citation classic papers. No author from LMICs led any of the most cited 100 SRM. There is a need to challenge the status quo. Scientists from LMIC

should forge multiple collaborations to share knowledge and expertise on SRM. In addition, there is a need to strengthen research capacity in these countries and more support should be provided for the advancement of research efforts.

## Author Contributions

Conceived and designed the experiments: OAU. Performed the experiments: OAU. Analyzed the data: OAU CO CW TY AC.

Contributed reagents/materials/analysis tools: OAU CO CW TY AC.  
Wrote the manuscript: OAU CO CW TY AC.

## References

- Evans D (2003) Hierarchy of evidence: a framework for ranking evidence evaluating healthcare interventions. *J Clin Nurs* 12: 77-84. doi:10.1046/j.1365-2702.2003.00662.x. PubMed: 12519253.
- Manchikanti L (2008) Evidence-based medicine, systematic reviews, and guidelines in interventional pain management, part I: introduction and general considerations. *Pain Physician* 11: 161-186. PubMed: 18354710.
- Wright RW, Brand RA, Dunn W, Spindler KP (2007) How to write a systematic review. *Clin Orthop Relat Res* 455: 23-29. doi:10.1097/BLO.0b013e31802c9098. PubMed: 17279036.
- Montori VM, Wilczynski NL, Morgan D, Haynes RB (2003) Systematic reviews: a cross-sectional study of location and citation counts. *BMC Med* 1: 2. doi:10.1186/1741-7015-1-2. PubMed: 14633274.
- Paladugu R, Schein M, Gardezi S, Wise L (2002) One hundred citation classics in general surgical journals. *World J Surg* 26: 1099-1105. doi:10.1007/s00268-002-6376-7. PubMed: 12209239.
- Baltussen A, Kindler CH (2004) Citation classics in critical care medicine. *Intensive Care Med* 30: 902-910. doi:10.1007/s00134-004-2195-7. PubMed: 14985952.
- Baltussen A, Kindler CH (2004) Citation classics in anesthetic journals. *Anesth Analg* 98: 443-451, table. PubMed: 14742385.
- Fenton JE, Roy D, Hughes JP, Jones AS (2002) A century of citation classics in otolaryngology-head and neck Surgery journals. *J Laryngol Otol* 116: 494-498. PubMed: 12238666.
- Tsai YL, Lee CC, Chen SC, Yen ZS (2006) Top-cited articles in emergency medicine. *Am J Emerg Med* 24: 647-654. doi:10.1016/j.ajem.2006.01.001. PubMed: 16984831.
- Montori VM, Wilczynski NL, Morgan D, Haynes RB (2005) Optimal search strategies for retrieving systematic reviews from Medline: analytical survey. *BMJ* 330: 68. doi:10.1136/bmj.38336.804167.47. PubMed: 15619601.
- Egghe L, Rousseau R, van Hooydonk G (2000) Methods for accrediting publications to authors or countries: consequences for evaluation studies. *J Am Soc Inf Sci* 51: 145-157. doi:10.1002/(SICI)1097-4571(2000)51:2.
- Gastner MT, Newman ME (2004) From The Cover: Diffusion-based method for producing density-equalizing maps. *Proc Natl Acad Sci U S A* 101: 7499-7504. doi:10.1073/pnas.15136719. PubMed: 15136719.
- Schein M, Fingerhut A (2000) Where can surgeons publish? *Br J Surg* 87: 261-264. doi:10.1046/j.1365-2168.2000.01419.x. PubMed: 10718791.
- Schein M, Paladugu R, Sutija VG, Wise L (2000) What American surgeons read: a survey of a thousand Fellows of the American College of Surgeons. *Curr Surg* 57: 252-258. doi:10.1016/S0149-7944(00)00177-X. PubMed: 10930623.
- Higgins JPT, Green S (2011) *Cochrane Handbook for Systematic Reviews of Interventions* Version 5.1.0 Updated March 2011. The Cochrane Collaboration. Available: [www.cochrane-handbook.org](http://www.cochrane-handbook.org).
- The Cochrane Collaboration (2013) *Cochrane Reviews*.
- Rahman M, Fukui T (2003) Biomedical research productivity: factors across the countries. *Int J Technol Assess Health Care* 19: 249-252. PubMed: 12701955.
- Uthman OA, Uthman MB (2007) Geography of Africa biomedical publications: an analysis of 1996-2005 PubMed papers. *Int J Health Geogr* 6: 46. doi:10.1186/1476-072X-6-46. PubMed: 17927837.
- Perez-Iratxeta C, Andrade MA (2002) Worldwide scientific publishing activity. *Science* 297: 519. doi:10.1126/science.297.5581.519b. PubMed: 12143877.
- Swingler GH, Volmink J, Ioannidis JP (2003) Number of published systematic reviews and global burden of disease: database analysis. *BMJ* 327: 1083-1084. doi:10.1136/bmj.327.7423.1083. PubMed: 14604930.
- Waters E, Doyle J (2004) Systematic reviews of public health in developing countries are in train. *BMJ* 328: 585. doi:10.1136/bmj.328.7439.585-a. PubMed: 15001523.
- Chinnock P, Siegfried N, Clarke M (2005) Is evidence-based medicine relevant to the developing world?: Systematic reviews have yet to achieve their potential as a resource for practitioners in developing countries. *Evid Based Complement Alternat Med* 2: 321-324. doi:10.1093/ecam/neh114. PubMed: 16136211.
- Gisvold SE (1999) Citation analysis and journal impact factors--is the tail wagging the dog? *Acta Anaesthesiol Scand* 43: 971-973. doi:10.1034/j.1399-6576.1999.431001.x. PubMed: 10593457.
- Seglen PO (1998) Citation rates and journal impact factors are not suitable for evaluation of research. *Acta Orthop Scand* 69: 224-229. doi:10.3109/17453679809000920. PubMed: 9703393.
- Dumont JE (1989) The bias of citations. *Trends Biochem Sci* 14: 327-328. doi:10.1016/0968-0004(89)90164-3. PubMed: 2799904.
